# Supplementary material for: Contextual tumor suppressor function of T cell death-associated gene 8 (TDAG8) in hematological malignancies
Source: PubMed Central journal article supplement (PMC5634876; doi:10.1186/s12967-017-1305-6), 2017-10-10

### Additional Figure S2

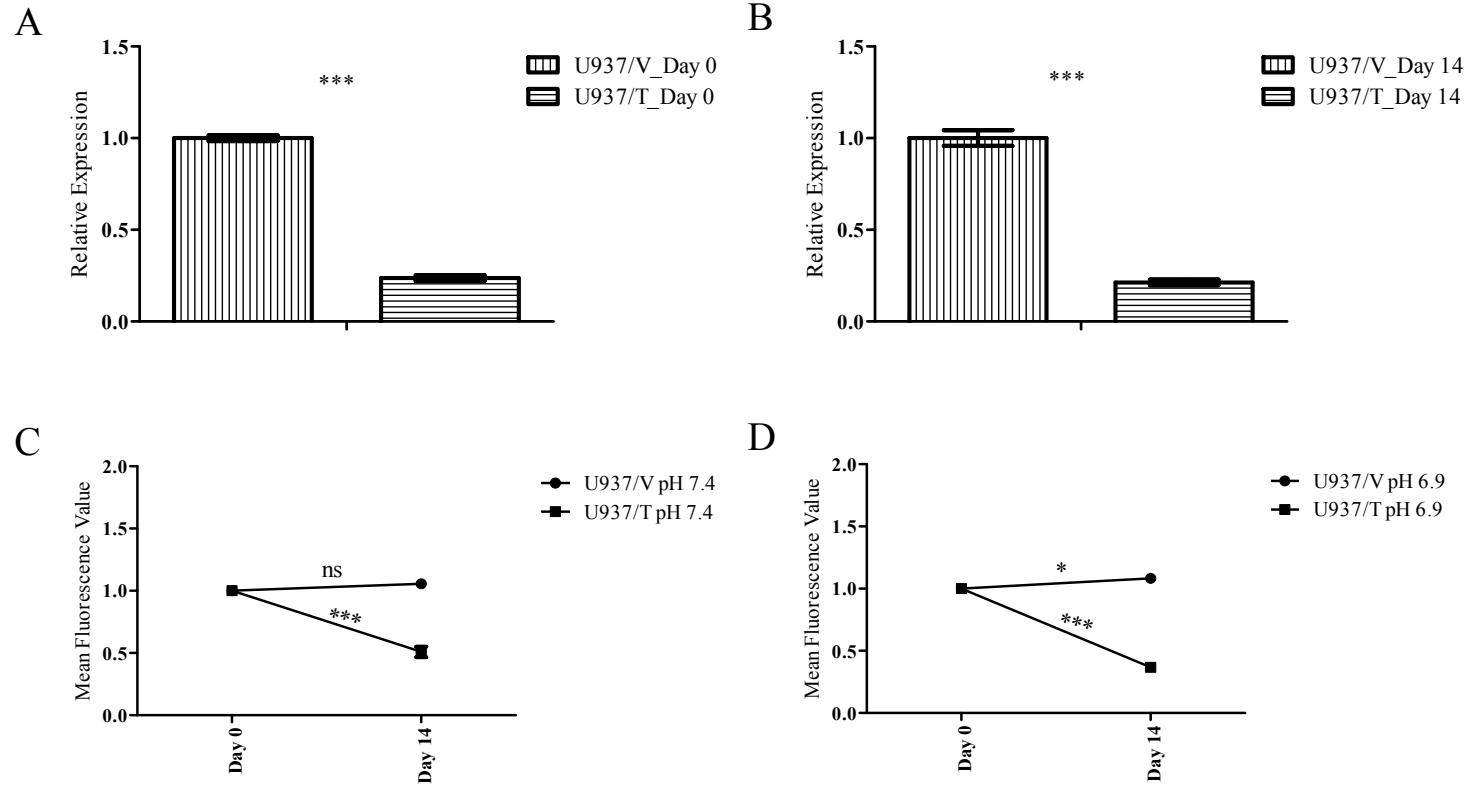

Additional Figure S3

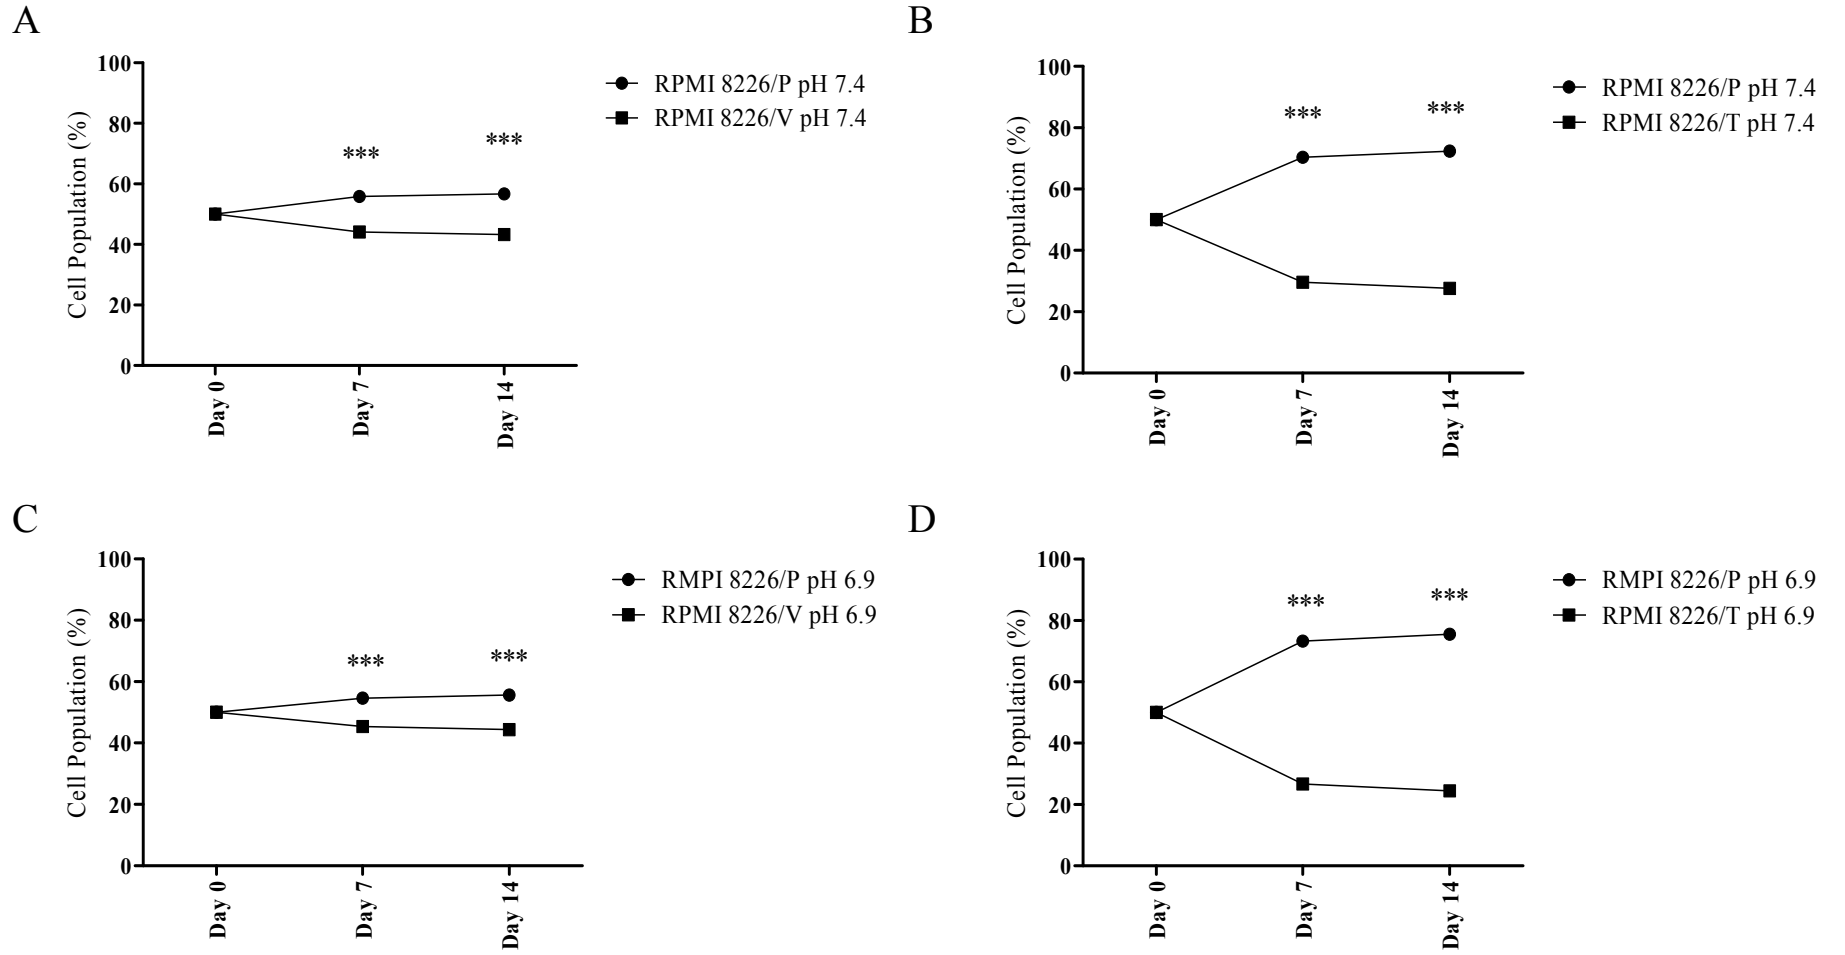

Additional Figure S4

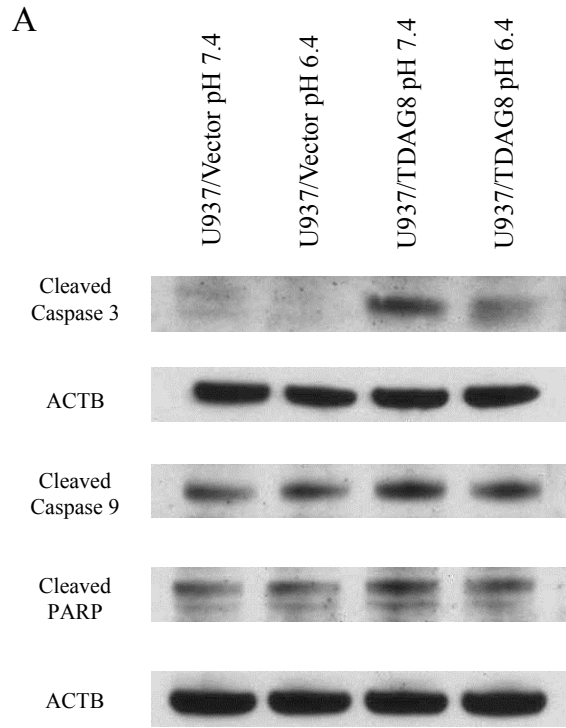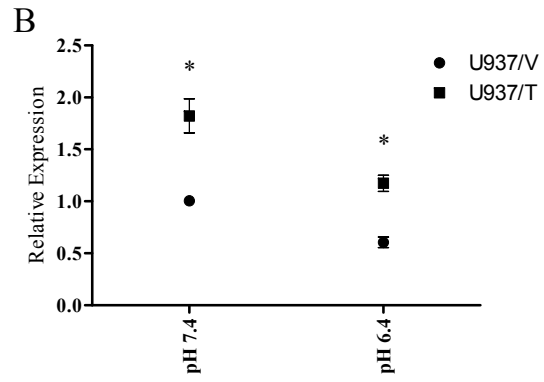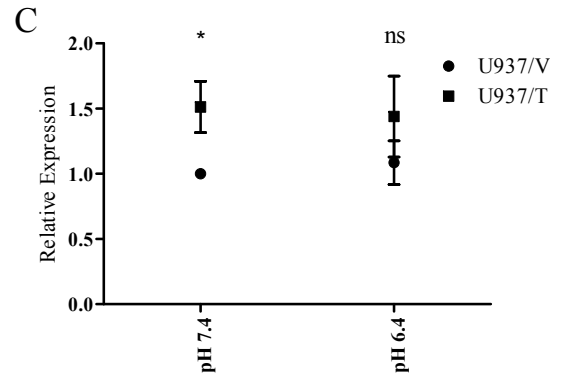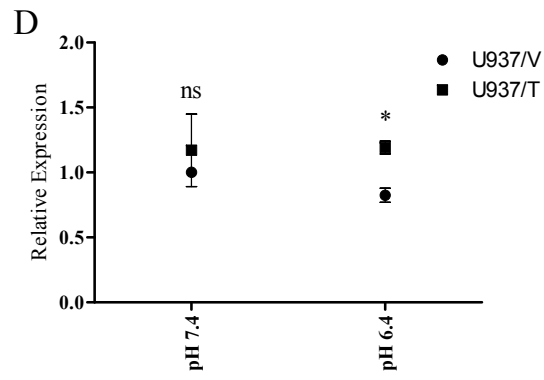

Additional Figure S5

A

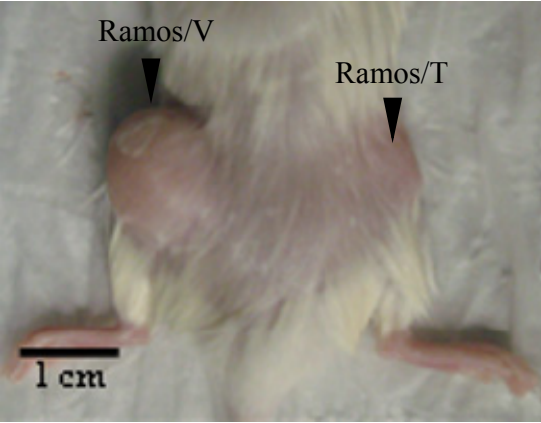

B

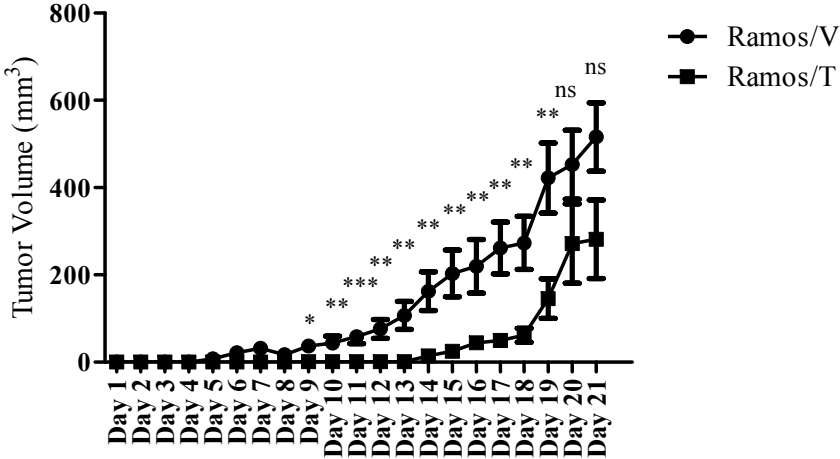

C

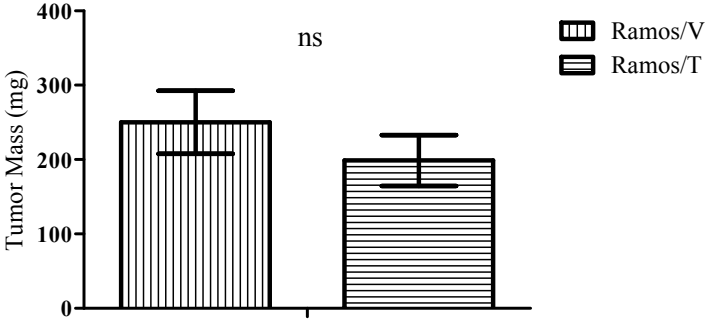

D

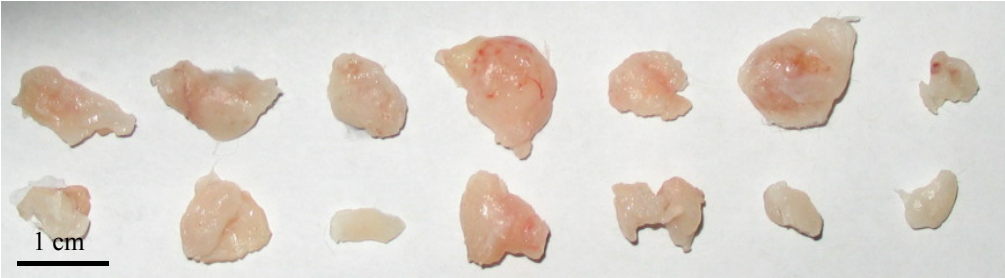

Additional Figure S6

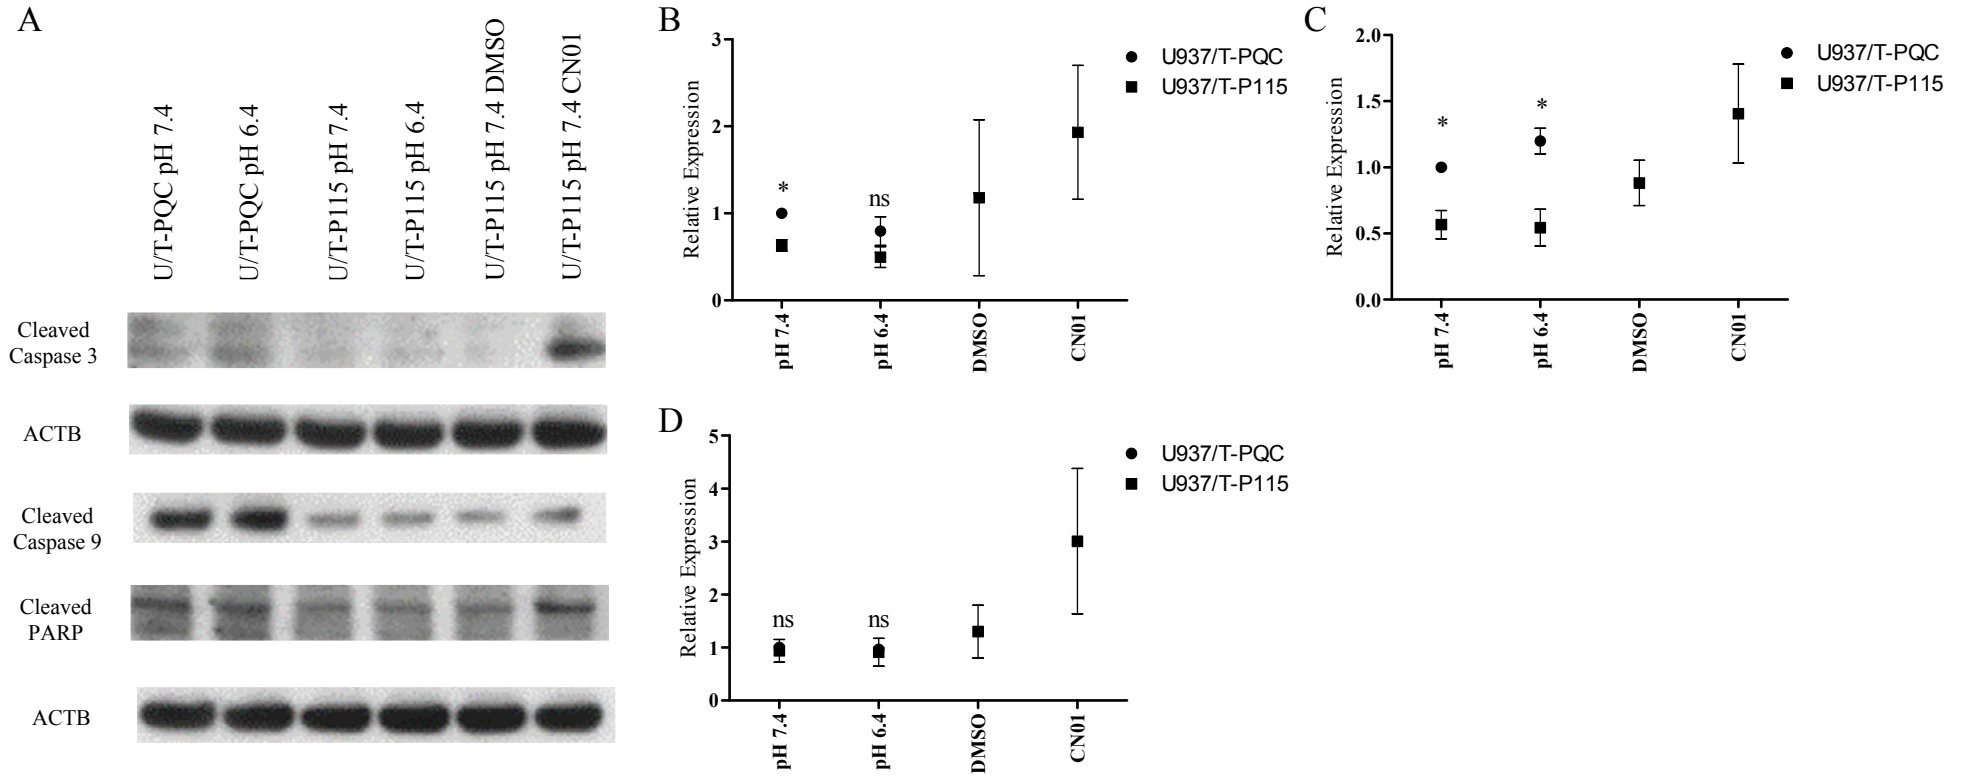

Additional Figure S7

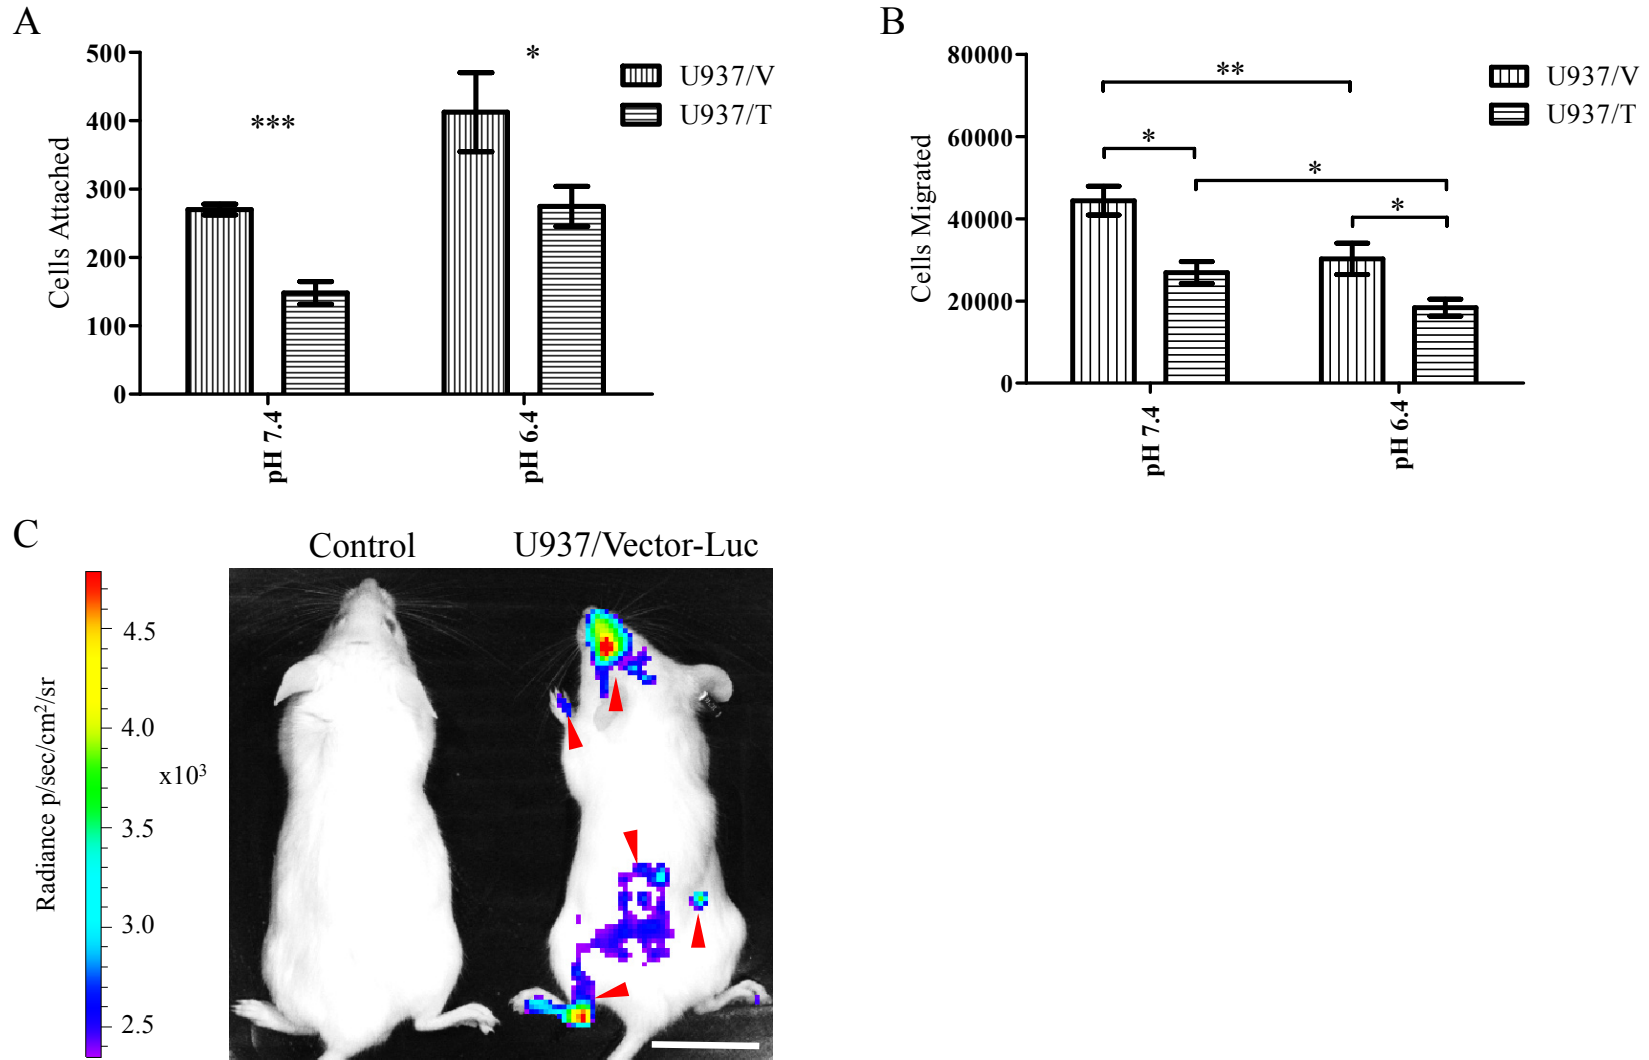

Supplement: 12967_2017_1305_MOESM1_ESM.pdf [file 12967_2017_1305_MOESM1_ESM.pdf]
